# Effect of different derivatization protocols on the calculation of trophic position using amino acids compound-specific stable isotopes

1 **Stephane Martinez<sup>1,2\*</sup>, Maya Lalzer<sup>3</sup>, Eli Shemesh<sup>1</sup>, Shai Einbinder<sup>2</sup>, Beverly Goodman**  
2 **Tchernov<sup>4</sup>, Dan Tchernov<sup>1,2</sup>**

3 <sup>1</sup> Department of Marine Biology, Leon H. Charney School of Marine Sciences, University of Haifa,  
4 Mt. Carmel, Haifa 3498838, Israel

5 <sup>2</sup> Morris Kahn Marine Research Station, University of Haifa, Sdot Yam, Israel

6 <sup>3</sup>Bioinformatics Core Unit, University of Haifa, Haifa, Israel

7 <sup>4</sup>Moses Strauss Department of Marine Geosciences, Leon H. Charney School of Marine Sciences,  
8 University of Haifa

9 **\* Corresponding author:**

10 Stephane Martinez

11 [Stephane.martinez@gmail.com](mailto:Stephane.martinez@gmail.com)

12 **Keywords: trophic discrimination factor, AA-CSIA, eastern Mediterranean Sea, food web,**  
13 **nitrogen isotopic composition, calibration**

## 14 **Abstract**

15 Amino acids compound-specific nitrogen stable isotope (AA-CSIA) is an emerging tool in  
16 ecology for understanding trophic system dynamics. While it has been successfully used for several  
17 independent studies across a range of environments and study locations, researchers have  
18 encountered calculation issues for determining trophic position values. Most studies introduce  
19 modifications to the constants of trophic position equation calculations, but then fail to account for  
20 the equation variations when comparing the results of separate research studies. The acceptance of  
21 this approach is related to the underlying presumption that no addition of the exogenous nitrogen  
22 atom occurs in the different methods and, therefore, such variations should not affect the outcome. In  
23 this paper, we evaluate the use of the EZfaast amino acid derivatization kit (chloroformate) and  
24 compare it to the isotopic results of two other derivatization methods. We highlight new  
25 considerations for working with AA-CSIA that might account for some of the variations in the results  
26 and lead researchers to modify constants in the equation. This likely requires developing the unique  
27 constants per derivatization method in order to be able to compare the trophic position results across  
28 different studies.

## 29 **1 Introduction**

30 Traditional methods for calculating the trophic position include stomach content analysis,  
31 bulk  $\delta^{15}\text{N}$  stable isotope analysis and, more recently, amino acid compound-specific nitrogen isotopic  
32 analysis (AA-CSIA). Stomach content analysis provides information on an individual's prey  
33 taxonomy and their relative importance within the food web. However, because it represents only a  
34 snapshot in time, this method exhibits bias from a myriad of factors including the proportion of  
35 identifiable dietary items, significant numbers of 'empty stomach' samples in top predator

36 collections, and varying digestibility of different prey species (i.e. residence time in the stomach).  
37 Therefore, when using the stomach content approach, large numbers of samples are needed to  
38 correctly evaluate the trophic position (Rindorf and Lewy, 2004), which is both labor-intensive and  
39 sometimes impossible. Bulk  $\delta^{15}\text{N}$  of whole organisms and their tissues has been used in several  
40 ecological studies as an alternative, or in tandem, to assess the trophic position and nitrogen flow in  
41 the food web (Yoshii et al., 1999; Post, 2002; Logan and Dodge, 2013; Vander Zanden et al., 2013).  
42 This approach maintains the observed relationship between rising  $\delta^{15}\text{N}$  (2–4‰) values and higher  
43 trophic positions (Minagawa and Wada, 1984). However, the increase in  $\delta^{15}\text{N}$  is not constant under  
44 all conditions and, therefore, results are only locally applicable and, in most cases are relative to other  
45 samples. The value is influenced by the food sources, stressors, consumer physiology, and natural  
46  $\delta^{15}\text{N}$  concentration of the surrounding environment. Constraining the nitrogen isotopic baseline, or  
47 isotopic composition of primary producers at the base of an ecosystem can be complicated and  
48 difficult, or impossible in certain environments (Popp et al., 2007). Thus, researchers were led to seek  
49 new methods to determine the trophic position using  $\delta^{15}\text{N}$  to better understand baseline values for  
50 purposes of interstudy normalization. McClelland and Montoya (2002) were the first to examine AA-  
51 CSIA for establishing a trophic position using nitrogen isotope. The research investigated the  
52 relationship between lab-cultivated phytoplankton and its consumer, zooplankton. They discovered  
53 that the "non-essential" AA glutamic-acid (also known as "trophic" AA) has become "heavier"  
54 (richer in  $\delta^{15}\text{N}$ ) compared to the bulk tissue. The "essential" AA phenylalanine (also known as  
55 "source" AA) is inert in terms of trophic position and is not affected by the organism's position on  
56 the food chain. However, it records the  $\delta^{15}\text{N}$  signature of the primary producer in the particular food  
57 web in question. Since both the isotopic baseline and fractionated information is retained in the  
58 nitrogen isotopic composition of AAs, results of AA-CSIA from a single consumer provide both an  
59 integrated measurement of trophic position and the  $\delta^{15}\text{N}$  value at the base of the food web. This  
60 eliminates the need to collect and analyze them independently of the predator species. In order to  
61 confirm the applicability of this approach to ecosystem-level studies (rather than species-specific),  
62 later studies tested several different macroalgae, phytoplankton, zooplankton gastropods, and fish in  
63 the natural environment and lab (Chikaraishi et al., 2007, 2009). It was concluded that due to the  
64 different traits of the AAs (glutamic-acid and phenylalanine), the trophic position can be readily  
65 calculated  $\text{TP}_{\text{Glu/Phe}} = ((\delta^{15}\text{N}_{\text{Glu}} - \delta^{15}\text{N}_{\text{Phe}} - \beta) / \text{TDF}_{\text{AA}}) + 1$  without the need to directly measure the  
66 primary producers  $\delta^{15}\text{N}$  (Chikaraishi et al., 2009; Steffan et al., 2013).

67 The constant,  $\beta$ , is the difference between the  $\delta^{15}\text{N}$  values of glutamic-acid and phenylalanine  
68 AAs in primary producers (trophic position 1). The trophic discrimination factor ( $\text{TDF}_{\text{AA}}$ ) is the  
69 average  $\delta^{15}\text{N}$  enrichment relative to source AAs per trophic position. When calculating the trophic  
70 position based on AA-CSIA, the " $\beta$ " and " $\text{TDF}_{\text{AA}}$ " are constant to and dependent on the nitrogen  
71 source. Chikaraishi et al. (2009) have found that for the marine environment  $\beta = 3.4 \pm 0.9\text{‰}$ , while for  
72 terrestrial environment values for  $\beta$  in C3 and C4 plants were  $-8.4 \pm 1.6\text{‰}$  and  $-0.4 \pm 1.7\text{‰}$ ,  
73 respectively (Chikaraishi et al., 2010). As for  $\text{TDF}_{\text{AA}}$ , it was thought to be  $7.6 \pm 1.7\text{‰}$  for all  
74 environments (Chikaraishi et al., 2009, 2010). However, further studies have found that this is not  
75 always accurate. Bradley et al. (2015) recalculated the " $\text{TDF}_{\text{AA}}$ " based on a variety of teleost from  
76 various trophic positions and found it to be inaccurate in the higher trophic positions, and instead  
77 established a value of  $5.7 \pm 0.3\text{‰}$ . Nielsen et al. (2015) performed similar work and produced  
78 calculations of  $6.6 \pm 1.7\text{‰}$ . McMahan and McCarthy (2016) reviewed the literature and found that the  
79 variability is higher (0‰–10‰) and dependent on a range of variables such as nitrogen excretion,  
80 diet, and trophic position. Since, presumably, no nitrogen atoms are added in the process of AA  
81 derivatization it is thought that using different methods will not influence the final result. Therefore,  
82 no comparison has been made between the different methods to check whether this might be the reason  
83 for the variability.

84 In this study, we test the influence of different derivatization methods and various locations  
85 on the AA isotopic ratio and trophic position *in situ*, in order to determine the influence of these  
86 factors on the calculation of trophic position and a better understanding of the used protocols.

87

## 88 2 Material and Methods

### 89 2.1 Sample collection

90 For comparison between sites, we used samples of fish and algae from the Eastern  
91 Mediterranean, Western Mediterranean, and the Red Sea, as well as fish samples from the Indian  
92 Ocean (fish only).

### 93 2.2 Sample preparation

94 All collected samples were immediately frozen and then lyophilized at the lab prior to the  
95 hydrolyzation. Approximately 1.5 mg of fish muscle (between the dorsal fin and the head) and 3-5  
96 mg of algae was acid hydrolyzed in 1 ml of 6 nmol HCl at 150 °C for 75 min (Cowie and Hedges,  
97 1992) under nitrogen atmosphere inside a 4 ml glass vial with PTFE cap. Samples were cooled to  
98 room temperature and algae samples were filtered through a 0.22 µ PTFE filter to remove all  
99 undissolved particles. The HCl was evaporated under a gentle stream of nitrogen and neutralized  
100 twice with 1 ml of ultra-pure water (also evaporated). For chloroformate derivatization, we used an  
101 EZfaast amino acid analysis kit, slightly modified by replacing reagent 6 with dichloromethane  
102 (DCM) as a solvent. For comparison, herbivorous fish samples were also derivatized following the  
103 Metges et al. (1996) protocol for N-Acetyl-n-propyl (NAP)-amino acid derivatization. The third  
104 approach from Silber et al. (1991) used Trifluoroacetic anhydride (TFAA) for the acylation.

105 For all methods, we injected 1.5 µl in a splitless mode at 250 °C. Helium was used as a carrier  
106 gas at a constant flow of 1.5 ml/min for the chloroformate and N-Acetyl-n-propyl; for the TFAA we  
107 used 1.1 ml/min. The chloroformate amino acids were separated on a Zebron ZB-50 column (30 m,  
108 0.25 mm, and 0.25 µm) in a Thermo Scientific Trace 1300 Gas chromatographer (GC). Conditions  
109 were set to optimize peak separation for the desired amino acids as follows: Initial temperature 110  
110 °C ramped to 240 °C at 8 °C per min and then ramped to 320 °C at 20 °C per min and held for 2.5  
111 min. The N-Acetyl-n-propyl (NAP)-amino acid was separated on the Thermo Scientific TraceGOLD  
112 TG-5MS column (30 m, 0.25 mm, and 0.25 µm) in a Thermo Scientific Trace 1300 Gas  
113 chromatographer (GC). Conditions were set to optimize peak separation for the desired amino acids  
114 as follows: Initial temperature 75 °C ramped to 130 °C at 4 °C per min, held for 2 min, ramped to 180  
115 °C at 5 °C per min, held for 2 min, ramped to 320 °C at 20 °C per min, and held for 1 min.

116 The TFAA derivatized amino acid were separated on the Thermo Scientific TraceGOLD TG-  
117 1MS column (30 m, 0.25 mm, and 0.25 µm) in a Thermo Scientific Trace 1300 Gas chromatographer  
118 (GC). Conditions were set to optimize peak separation for the desired amino acids as follows: Initial  
119 temperature 75 °C held for 1 min ramped to 90 °C at 7.5 °C per min, held for 1.5 min, ramped to 160  
120 °C at 7 °C per min, held for 3.5 min, ramped to 320 °C at 25 °C per min, and held for 2 min. The  
121 separated amino acids were split on a MicroChannel Device into two directions, one toward the  
122 Thermo Scientific ISQ quadrupole for amino acid identification and the second toward the Thermo  
123 Scientific Delta V advantage for N<sub>2</sub> isotope analysis. The ISQ conditions were set to transfer line 310  
124 °C, ion source 240 °C, and scanned in the range 43 to 450 m/z mass range. To define the isotopic  
125 ratio of nitrogen, the separated amino acids were combusted in a Thermo scientific GC isolink II at

126 1000 °C. Before entering to Delta V for the N<sub>2</sub> analysis, the sample went through a liquid nitrogen  
127 cold trap to freeze all other gases. A triplicate was injected from each sample.

### 128 **2.3 Data analysis and corrections**

129 Separated amino acids were purchased from Sigma Aldrich and analyzed with the Geological  
130 Survey of Israel's elemental analyzer isotope ratio mass spectrometer. To extend the nitrogen  
131 isotopic range, two certified amino acids (Alanine +43.25‰ and Valine +30.19‰) were purchased  
132 from Arndt Schimmelmann (Biogeochemical Laboratories, Indiana University). We used a standard  
133 that contains seven amino acids with a known isotopic ratio (Alanine, Valine, Leucine, Isoleucine,  
134 Methionine, Glutamic acid, and Phenylalanine) with an isotopic range for the nitrogen of -6.69‰ to  
135 +43.25‰. Since nitrogen is not added in the process of derivatization, corrections for nitrogen  
136 addition were not required. The standard of amino acids was injected three times after the  
137 combustion reactor oxidation and to allow for drift correction, the standard was injected again three  
138 times after a maximum of 18 sample injections. Since AAs differ in the presence of heteroatoms and  
139 functional groups, this may lead to different combustion efficiencies and, therefore, variation in drift.  
140 To compensate for this drift an average of the standard injection from the beginning and the end of  
141 the sequence were used. For each sequence, a correction factor was applied based on the linear  
142 regression equation of the ratio between the known AA isotopic ratio and the acquired result for the  
143 sequence. Stable isotope ratios were expressed in standard  $\delta$  notation where the standard for nitrogen  
144 is atmospheric N<sub>2</sub> (air).

### 145 **2.4 Trophic Position calculation**

146 The trophic position was calculated from the equation  
147  $TP_{Glu/Phe} = ((\delta^{15}N_{Glu} - \delta^{15}N_{Phe} - \beta) / TDF_{AA}) + 1$  (Chikaraishi et al., 2009). To examine the influence of  
148 the site factor on the trophic position, we re-calculated the values needed for the equation. All  
149 samples analyzed were from the eastern Mediterranean Sea. To calculate  $\beta$ , we used 10 different  
150 algae (Supplementary Table 1). For TDF<sub>AA</sub> calculation, we used 17 herbivorous fish (*Siganus*  
151 *rivulatus* and *S. luridus*) (Supplementary Table 2). Calculations yielded the following values:  $\beta = -0.36$   
152  $\pm 1.49$ ‰ and  $TDF_{AA} = 4.54 \pm 1.36$ ‰.

## 153 **3 Results**

### 154 **3.1 Trophic position of samples from different locations**

155 Samples from different locations (Red Sea, Indian Ocean, and western Mediterranean Sea)  
156 were compared for the calculated trophic position against samples from the eastern Mediterranean  
157 Sea (Figure 1 and Supplementary Table 3). Trophic position calculations were based on AA-CSIA of  
158 nitrogen using the equation we built on the eastern Mediterranean Sea samples. A Kruskal-Wallis  
159 rank-sum test was used to determine the significant difference between samples. We did not find any  
160 significant differences between samples.

### 161 **3.2 Comparison of the nitrogen isotopic values between different derivatization methods**

162 *S. rivulatus* (n=10) was analyzed using three different methods: chloroformate, NAP (N-  
163 Acetyl-n-propyl), and TFAA. We compared Glutamic acid and Phenylalanine  $\delta^{15}N$  (Figure 2 and  
164 Supplementary Table 4), the two most commonly used amino acids for calculation of trophic position  
165 (Chikaraishi et al., 2009). We applied a Kruskal-Wallis rank-sum test and then adjusted the p-values  
166 with the Benjamini-Hochberg method. There was a significant difference in Glutamic acid between

167 Chloroformate to NAP and between Chloroformate to TFAA. In the Phenylalanine, there was a  
168 significant difference between Chloroformate to TFAA and between TFAA to NAP. There was no  
169 consistency in the shift of the isotopic value between the methods and, therefore, no correction factor  
170 can be applied.

#### 171 4 Discussion

172 In reviewing the literature related to the calculation of the trophic position of teleost using AA-  
173 CSIA, it was noted that different studies used different derivatization methods (e.g. Chikaraishi et al.  
174 2009; Bradley et al. 2015; Nuche-Pascual et al. 2018). In all these methods, no correction was made  
175 for nitrogen, given that no nitrogen atoms were added in the process. In this study, we used the  
176 EZfaast kit, as it is considered to be the easiest, fastest, and safest method to work with; though it is  
177 not reported to be used in previous AA-CSIA studies. The isotopic ratio results from the present  
178 analysis, however, did not match any known equations in the literature. This research was  
179 concentrated on the Eastern Mediterranean Sea, which is ultraoligotrophic and phosphate-limited,  
180 even when compared to classic “blue deserts” such as tropical coral reef environments and mid-ocean  
181 gyres in the Pacific Ocean (Krom et al., 2010). Because of these conditions, we must distinguish  
182 between the potential effect of the method we are using and the unique influence of local  
183 environmental effects. To resolve this, we performed our measurements both on the eastern  
184 Mediterranean Sea as well as the Red Sea, Indian Ocean, and western Mediterranean Sea samples  
185 (Supplementary Table 3). None of the results matched previously reported values using traditional  
186 equations. Therefore, we decided, initially, to form our equation based on samples that are readily  
187 available locally. For calculating  $\beta$  we used ten different algae which produced a  $\beta$  value of  $-0.36$   
188  $\pm 1.49\%$ . To calculate the  $TDF_{AA}$ , we chose two herbivorous species (*S. rivulatus* and *S. luridus*) that,  
189 based on literature, has a purely herbivorous diet (Woodland, 1990). From those 17 specimens, we  
190 calculated the  $TDF_{AA}$  value of  $4.54 \pm 1.36\%$ . Using these newly calculated constants, we compared  
191 the trophic position of samples from the eastern Mediterranean Sea to samples from the other sources  
192 (Red Sea, Indian Ocean, and the Western Mediterranean). We did not find any significant difference  
193 between the eastern Mediterranean Sea to the other samples (Figure 1), hence verifying it was not an  
194 environmental factor that caused the differential results in trophic position. Also, the trophic position  
195 we calculated for *Boops boops* and *Sardinella aurita* samples from all locations are in the range that  
196 is reported in the literature (Tsikliras et al., 2005; Bode et al., 2006; Madkour, 2012; Mancinelli et al.,  
197 2013; Cresson et al., 2014; Albo-Puigserver et al., 2016). Although not significantly different from  
198 the Mediterranean Sea, the trophic position measured for the Red Sea samples of *S. rivulatus*,  
199 described as a pure herbivore ( $TP=2.1\pm 0.1$ ) were slightly higher ( $TP=2.5\pm 0.5$ ) than reported in the  
200 literature (Woodland, 1990). That might be due to the reason that these same species were recently  
201 documented eating ctenophores and scyphozoans on top of algae and other invertebrates that are part  
202 of the alga biome (Bos et al., 2017; Guy-Haim et al., 2017). Therefore, we conclude that although in  
203 many aspects the eastern Mediterranean Sea is a unique environment, the measured variations as  
204 compared to other places are not significant enough to impact the trophic position and, therefore, the  
205 equation is robust enough to be more broadly applied.

206 To further validate the equation (in combination with the technique), we tested ten different  
207 samples of *S. rivulatus* using three different methods (Chloroformate (EZfaast), NAP (N-Acetyl-n-  
208 propyl) and TFAA; Supplementary Table 4). We compared Glutamic acid and Phenylalanine  $\delta^{15}N$ ,  
209 the two most widely used amino acids for trophic position calculations (Figure 2). Although nitrogen  
210 is not added in any of the derivatization protocols, we still observe differences in the isotopic ratios  
211 of nitrogen. Our study is in agreement with a previous study by Hofmann et al. (2003) that found  
212 differences between the isotopic values of different analytical methods and, therefore, an additional

213 source must be present that causes these isotopic differences. There is a multitude of possible  
214 explanations. We can attribute the difference to the impurity of the AA, specifically from a non-AA  
215 matrix in the derivatization process or some fatty acids that can also go through the derivatization  
216 process alongside the amino acids. Another possibility could be related to different AA extraction  
217 efficiencies, variations that will occur due to the differential reaction of derivatized compounds with  
218 the combustion reactor on different conditions. In addition, glutamic acid can partially be cyclized  
219 into Pyroglutamic acid, or a number of other factors (Castro et al., 1997; Goto et al., 2011; Walsh et  
220 al., 2014). The consistency between isotopic ratios within any given protocol, but not between  
221 different procedures, emphasizes the importance of applying the correct constant of  $\beta$  and  $TDF_{AA}$  per  
222 specific protocol in order to conduct interstudy comparisons. Here, we adapted the Ezfasst kit  
223 (chloroformate) for quick, safe, and easy analyses of AA-CSIA and provided a robust equation for  
224 this protocol that allows for accuracy and precision regardless of the geographic origins of the  
225 samples.

## 226 **5 Conflict of Interest**

227 The authors declare that the research was conducted in the absence of any commercial or financial  
228 relationships that could be construed as a potential conflict of interest.

## 229 **6 Author Contributions**

230 SM, DT, SE, and ML participated in the design of the study. SM and ES conducted the isotopic  
231 analysis. SM, DT, and BG, contributed to the writing and improving of the manuscript. SM and ML  
232 participated in the data analysis. All authors contributed and approved the manuscript.

## 233 **7 Funding**

234 Wolfson Foundation, Kahn Foundation, J Isaacs Charitable Foundation and the Kadas Charitable  
235 Trust supported this research.

## 236 **8 Acknowledgments**

237 The authors would like to thank Dr Tali Mass, Dr Nir Stern and Dr Christine Ferrier Pages for their  
238 assistance in collecting samples at the various sites.

239

## 240 **9 References**

- 241 Albo-Puigserver, M., Navarro, J., Coll, M., Layman, C. A., and Palomera, I. (2016). Trophic  
242 structure of pelagic species in the northwestern Mediterranean Sea. *J. Sea Res.* 117, 27–35.  
243 doi:10.1016/j.seares.2016.09.003.
- 244 Bode, A., Carrera, P., and Porteiro, C. (2006). “Stable nitrogen isotopes reveal weak dependence of  
245 trophic position of planktivorous fish on individual size: A consequence of omnivorism and  
246 mobility,” in *Radionuclides in the Environment: International Conference on Isotopes in  
247 Environmental Studies* (Elsevier Masson SAS), 281–293. doi:10.1016/S1569-4860(05)08022-8.

- 248 Bos, A. R., Cruz-Rivera, E., and Sanad, A. M. (2017). Herbivorous fishes *Siganus rivulatus*  
249 (*Siganidae*) and *Zebrasoma desjardini* (*Acanthuridae*) feed on Ctenophora and Scyphozoa in the  
250 Red Sea. *Mar. Biodivers.* 47, 243–246. doi:10.1007/s12526-016-0454-9.
- 251 Bradley, C. J., Wallsgrove, N. J., Choy, C. A., Drazen, J. C., Hetherington, E. D., Hoen, D. K., et al.  
252 (2015). Trophic position estimates of marine teleosts using amino acid compound specific  
253 isotopic analysis. *Limnol. Oceanogr. Methods* 13, 476–493. doi:10.1002/lom3.10041.
- 254 Castro, R. M., Carbó, M. T. D., Martínez, V. P., Adelantado, J. V. G., and Reig, F. B. (1997). Study  
255 of binding media in works of art by gas chromatographic analysis of amino acids and fatty acids  
256 derivatized with ethyl chloroformate. *J. Chromatogr. A* 778, 373–381. doi:10.1016/S0021-  
257 9673(97)00284-7.
- 258 Chikaraishi, Y., Kashiyama, Y., Ogawa, N. O., Kitazato, H., and Ohkouchi, N. (2007). Metabolic  
259 control of nitrogen isotope composition of amino acids in macroalgae and gastropods□:  
260 implications for aquatic food web studies. *Mar. Ecol. Prog. Ser.* 342, 85–90.
- 261 Chikaraishi, Y., Ogawa, N. O., Kashiyama, Y., Takano, Y., Suga, H., Tomitani, A., et al. (2009).  
262 Determination of aquatic food-web structure based on compound-specific nitrogen isotopic  
263 composition of amino acids. *Limnol. Oceanogr. Methodes* 7, 740–750. Available at:  
264 <https://www.aslo.org/lomethods/free/2009/0740.pdf> [Accessed June 11, 2014].
- 265 Chikaraishi, Y., Ogawa, N. O., and Ohkouchi, N. (2010). Further evaluation of the trophic level  
266 estimation based on nitrogen isotopic composition of amino acids. *Earth, life, Isot.*, 37–51.  
267 Available at: <https://www.researchgate.net/publication/281297005> [Accessed March 11, 2019].
- 268 Cowie, G. L., and Hedges, J. I. (1992). Improved amino acid quantification in environmental  
269 samples: charge-matched recovery standards and reduced analysis time. *Mar. Chem.* 37, 223–  
270 238. doi:10.1016/0304-4203(92)90079-P.
- 271 Cresson, P., Ruitton, S., Ourgaud, M., and Harmelin-Vivien, M. (2014). Contrasting perception of  
272 fish trophic level from stomach content and stable isotope analyses: A Mediterranean artificial  
273 reef experience. *J. Exp. Mar. Bio. Ecol.* 452, 54–62. doi:10.1016/j.jembe.2013.11.014.
- 274 Goto, A., Korenaga, T., and Chikaraishi, Y. (2011). Methyl and ethyl chloroformate derivatizations  
275 for compound-specific stable isotope analysis (CSIA) of fatty acids(Advances in molecular and  
276 stable isotope studies among the organic geochemical and related communities (Part II)). *Res.*  
277 *Org. geochemistry* 27, 91–95. doi:10.20612/rog.27.0\_91.

- 278 Guy-Haim, T., Hyams-Kaphzan, O., Yeruham, E., Almogi-Labin, A., and Carlton, J. T. (2017). A  
279 novel marine bioinvasion vector: Ichthyochory, live passage through fish. *Limnol. Oceanogr.*  
280 *Lett.* 2, 81–90. doi:10.1002/lo2.10039.
- 281 Hofmann, D., Gehre, M., and Jung, K. (2003). Sample preparation techniques for the determination  
282 of natural  $^{15}\text{N}/^{14}\text{N}$  variations in amino acids by gas chromatography-combustion-isotope ratio  
283 mass spectrometry (GC-C-IRMS). *Isotopes Environ. Health Stud.* 39, 233–244.  
284 doi:10.1080/1025601031000147630.
- 285 Krom, M. D., Emeis, K.-C., and Van Cappellen, P. (2010). Why is the Eastern Mediterranean  
286 phosphorus limited? *Prog. Oceanogr.* 85, 236–244. doi:10.1016/j.pocean.2010.03.003.
- 287 Logan, J. M., and Dodge, K. L. (2013). Comment on “stable isotopes challenge the perception of  
288 ocean sunfish *Mola mola* as obligate jellyfish predators”. *J. Fish Biol.* 82, 1–9.  
289 doi:10.1111/j.1095-8649.2012.03432.x.
- 290 Madkour, F. F. (2012). Feeding ecology of the round sardinella, *Sardinella aurita* in the Egyptian  
291 Mediterranean waters. *J. Environ. Sci. Eng.* 2, 83–92.
- 292 Mancinelli, G., Vizzini, S., Mazzola, A., Maci, S., and Basset, A. (2013). Cross-validation of  $\delta^{15}\text{N}$   
293 and FishBase estimates of fish trophic position in a Mediterranean lagoon: The importance of  
294 the isotopic baseline. *Estuar. Coast. Shelf Sci.* 135, 77–85. doi:10.1016/j.ecss.2013.04.004.
- 295 McClelland, J., and Montoya, J. (2002). Trophic relationships and the nitrogen isotopic composition  
296 of amino acids in plankton. *Ecology* 83, 2173–2180. Available at:  
297 [http://www.esajournals.org/doi/abs/10.1890/0012-](http://www.esajournals.org/doi/abs/10.1890/0012-9658(2002)083%5B2173:TRATNI%5D2.0.CO%3B2)  
298 [9658\(2002\)083%5B2173:TRATNI%5D2.0.CO%3B2](http://www.esajournals.org/doi/abs/10.1890/0012-9658(2002)083%5B2173:TRATNI%5D2.0.CO%3B2) [Accessed July 17, 2014].
- 299 McMahan, K. W., and McCarthy, M. D. (2016). Embracing variability in amino acid  $\delta^{15}\text{N}$   
300 fractionation: Mechanisms, implications, and applications for trophic ecology. *Ecosphere* 7,  
301 e01511. doi:10.1002/ecs2.1511.
- 302 Metges, C. C., Petzke, K. J., and Hennig, U. (1996). Gas chromatography/combustion/isotope ratio  
303 mass spectrometric comparison of N-acetyl- and N-pivaloyl amino acid esters to measure  $^{15}\text{N}$   
304 isotopic abundances in physiological samples: A pilot study on amino acid synthesis in the  
305 upper gastro-intestinal tract. *J. Mass Spectrom.* 31, 367–376. doi:10.1002/(SICI)1096-  
306 9888(199604)31:4<367::AID-JMS310>3.0.CO;2-V.
- 307 Minagawa, M., and Wada, E. (1984). Stepwise enrichment of  $^{15}\text{N}$  along food chains: Further



- 308 evidence and the relation between  $\delta^{15}\text{N}$  and animal age. *Geochim. Cosmochim. Acta* 48,  
309 1135–1140. Available at: <http://www.sciencedirect.com/science/article/pii/S0016703784902047>  
310 [Accessed October 5, 2014].
- 311 Nielsen, J. M., Popp, B. N., and Winder, M. (2015). Meta-analysis of amino acid stable nitrogen  
312 isotope ratios for estimating trophic position in marine organisms. *Oecologia* 178, 631–642.  
313 doi:10.1007/s00442-015-3305-7.
- 314 Nucho-Pascual, M. T., Lazo, J. P., Ruiz-Cooley, R. I., and Herzka, S. Z. (2018). Amino acid-specific  
315  $\delta^{15}\text{N}$  trophic enrichment factors in fish fed with formulated diets varying in protein quantity  
316 and quality. *Ecol. Evol.* 8, 9192–9217. doi:10.1002/ece3.4295.
- 317 Popp, B. N., Graham, B. S., Olson, R. J., Hannides, C. C. S., Lott, M. J., López-Ibarra, G. A., et al.  
318 (2007). “Insight into the Trophic Ecology of Yellowfin Tuna, *Thunnus albacares*, from  
319 Compound-Specific Nitrogen Isotope Analysis of Proteinaceous Amino Acids,” in *Terrestrial*  
320 *Ecology*, 173–190. doi:10.1016/S1936-7961(07)01012-3.
- 321 Post, D. (2002). Using stable isotopes to estimate trophic position: models, methods, and  
322 assumptions. *Ecology* 83, 703–718. Available at:  
323 [http://www.esajournals.org/doi/abs/10.1890/0012-](http://www.esajournals.org/doi/abs/10.1890/0012-9658(2002)083%5B0703:USITET%5D2.0.CO%3B2)  
324 [9658\(2002\)083%5B0703:USITET%5D2.0.CO%3B2](http://www.esajournals.org/doi/abs/10.1890/0012-9658(2002)083%5B0703:USITET%5D2.0.CO%3B2) [Accessed July 17, 2014].
- 325 Rindorf, A., and Lewy, P. (2004). Bias in estimating food consumption of fish by stomach-content  
326 analysis. *Can. J. Fish. Aquat. Sci.* 61, 2487–2498. doi:10.1139/f04-200.
- 327 Silfer, J., Engel, M., Macko, S., and Jumeau, E. (1991). Stable carbon isotope analysis of amino acid  
328 enantiomers by conventional isotope ratio mass spectrometry and combined gas  
329 chromatography/isotope ratio mass. *Anal. Chem.*, 370–374. Available at:  
330 <http://pubs.acs.org/doi/abs/10.1021/ac00004a014> [Accessed June 18, 2014].
- 331 Steffan, S. a, Chikaraishi, Y., Horton, D. R., Ohkouchi, N., Singleton, M. E., Miliczky, E., et al.  
332 (2013). Trophic hierarchies illuminated via amino acid isotopic analysis. *PLoS One* 8, e76152.  
333 doi:10.1371/journal.pone.0076152.
- 334 Tsikliras, A., Torre, M., and Stergiou, K. (2005). Feeding habits and trophic level of round sardinella  
335 (*Sardinella aurita*) in the northeastern Mediterranean (Aegean Sea, Greece). *J. Biol. Res.* 3, 67–  
336 75.
- 337 Vander Zanden, H., Arthur, K., Bolten, A., Popp, B., Lagueux, C., Harrison, E., et al. (2013). Trophic

- 338 ecology of a green turtle breeding population. *Mar. Ecol. Prog. Ser.* 476, 237–249.  
339 doi:10.3354/meps10185.
- 340 Walsh, R. G., He, S., and Yarnes, C. T. (2014). Compound-specific  $\delta^{13}\text{C}$  and  $\delta^{15}\text{N}$  analysis of  
341 amino acids: A rapid, chloroformate-based method for ecological studies. *Rapid Commun. Mass*  
342 *Spectrom.* 28, 96–108. doi:10.1002/rcm.6761.
- 343 Woodland, D. J. (1990). Revision of the fish family Siganidae with descriptions of two new species  
344 and comments on distribution and biology. *Indo-Pacific Fishes* 19, 136.
- 345 Yoshii, K., Melnik, N. G., Timoshkin, O. A., Bondarenko, N. A., Anoshko, P. N., Yoshioka, T., et al.  
346 (1999). Stable isotope analyses of the pelagic food web in Lake Baikal. *Limnol. Oceanogr.* 44,  
347 502–511. Available at: <http://lin.irk.ru/pdf/516.pdf> [Accessed July 17, 2014].

348

349 **Figure caption**

350 Figure 1. **Trophic position of samples from different locations.** The red square marks the average  
351 trophic position, the black bar in the box marks the median, the black dots are outlier values and the  
352 blue bars mark the literature-based trophic position range.

353 Figure 2. **Comparison of the nitrogen isotopic values between different derivatization methods**

354 The black bar in the box marks the median  $\delta^{15}\text{N}$  value and the black dots are outlier values. Statistical  
355 significance is indicated in bold letters, and p-values are considered for  $p < 0.05$ .

356

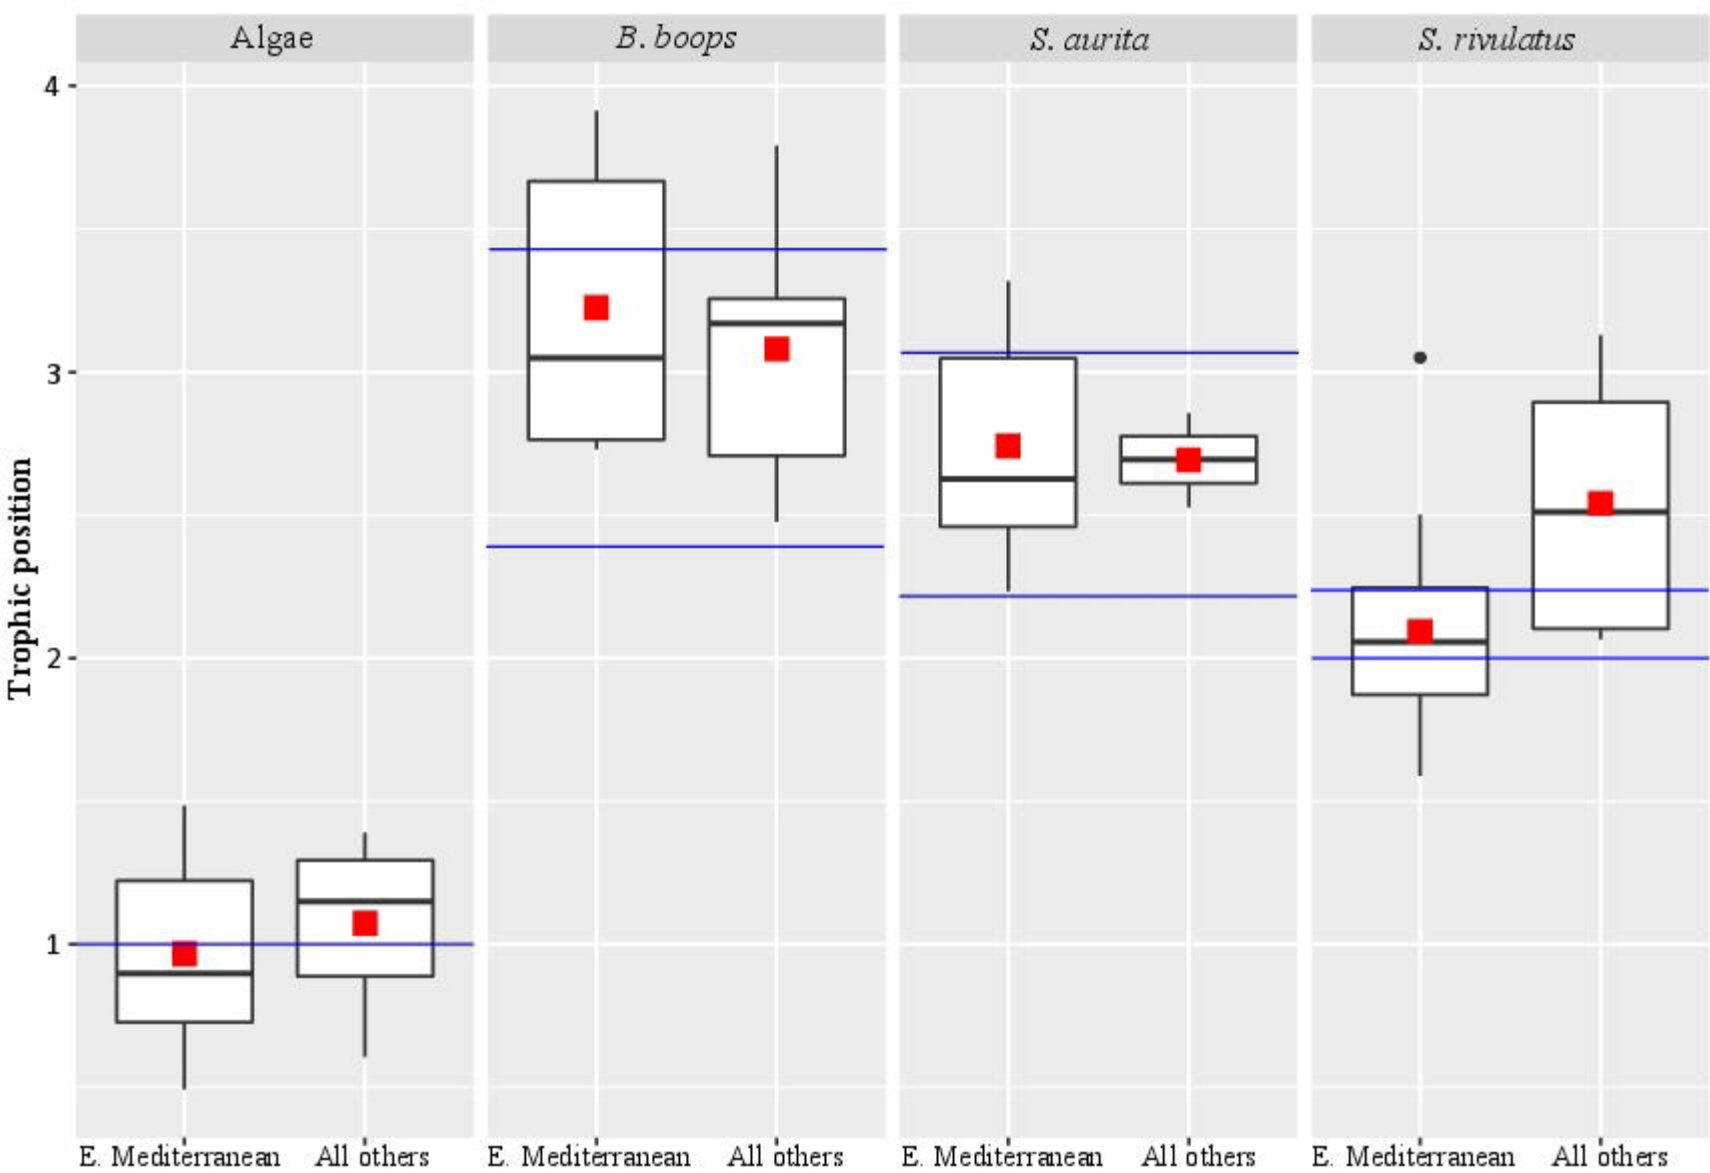

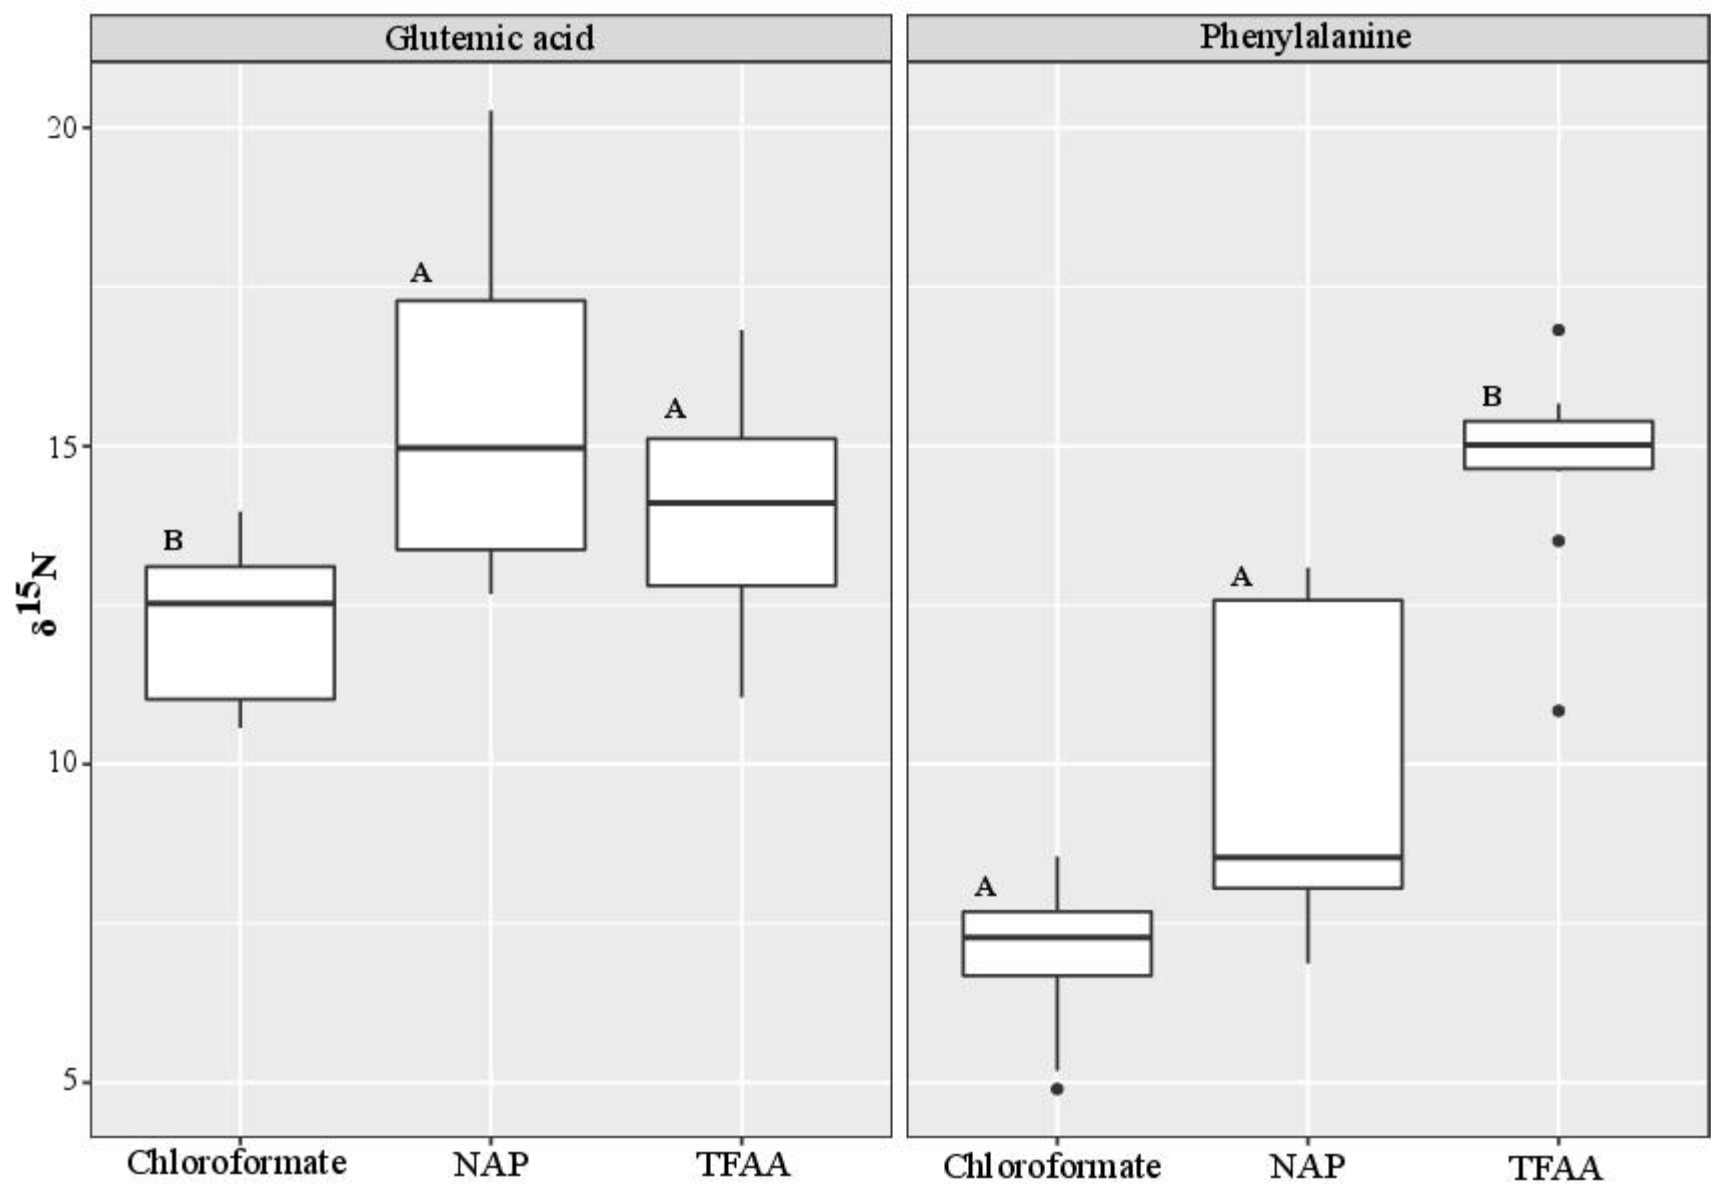

Source: https://www.biorxiv.org/content/10.1101/2020.05.12.091785v1.full.pdf
